# Supplementary material for: Identification, expression, and molecular evolution of microRNAs in the “living fossil” Triops cancriformis (tadpole shrimp)
Source: PubMed Central journal article supplement — RNA. 2015 Feb;21(2):230–42. doi: 10.1261/rna.045799.114 (PMC4338350; doi:10.1261/rna.045799.114), 2015-02
Supplement: supp_045799.114_TabS1_S9_FigS1-S5.pdf [file supp_045799.114_TabS1_S9_FigS1-S5.pdf]

**Table S1. Summary of the small RNA reads in this study**

|                                                             | <b>Egg</b> | <b>1<sup>st</sup> Instar</b> | <b>2<sup>nd</sup> Instar</b> | <b>3<sup>rd</sup> Instar</b> | <b>4<sup>th</sup> Instar</b> | <b>Adult</b> |
|-------------------------------------------------------------|------------|------------------------------|------------------------------|------------------------------|------------------------------|--------------|
| Illumina sequencing reads                                   | 5,633,241  | 3,527,456                    | 4,041,614                    | 3,857,810                    | 3,695,978                    | 3,943,449    |
| Reads counts of $\geq 5$                                    | 579,881    | 447,023                      | 536,984                      | 455,710                      | 462,298                      | 476,686      |
| Reads mapped to <i>Triops</i> genomic sequences             | 388,360    | 405,810                      | 484,109                      | 412,425                      | 414,983                      | 432,126      |
| miRNA fraction reads (18-24 nt)                             | 72,071     | 66,949                       | 79,489                       | 62,687                       | 64,709                       | 52,270       |
| Reads that did not match known <i>Triops</i> cDNA sequences | 46,989     | 58,533                       | 69,924                       | 57,811                       | 55,819                       | 40,301       |
| Conserved miRNAs                                            | 68         | 85                           | 86                           | 86                           | 87                           | 83           |
| Novel candidate miRNAs                                      | 65         | 74                           | 83                           | 81                           | 82                           | 71           |
| Unannotated small RNA reads                                 | 46,856     | 58,374                       | 69,755                       | 57,644                       | 55,650                       | 40,147       |

**Table S2. Nucleotide sequences of conserved miRNAs in *Triops cancriformis* and their read numbers for each developmental stage**

| miRNA name      | miRNA sequence           | Egg     | 1 <sup>st</sup> Instar | 2 <sup>nd</sup> Instar | 3 <sup>rd</sup> Instar | 4 <sup>th</sup> Instar | Adult  | Average read | *Reliability level |
|-----------------|--------------------------|---------|------------------------|------------------------|------------------------|------------------------|--------|--------------|--------------------|
| tcf-bantam      | UGAGAUCUAUUGGAAAGCUGAUU  | 40083   | 91300                  | 122780                 | 297010                 | 357576                 | 331433 | 206697.0     | 4                  |
| tcf-let-7-3p    | CUGUACACUUCUAACUUUCC     | 0       | 22                     | 54                     | 173                    | 151                    | 649    | 174.8        | 4                  |
| tcf-let-7-5p    | UGAGGUAGUAGGUUUGUUGUU    | 23      | 174                    | 687                    | 2627                   | 4568                   | 29195  | 6212.3       | 4                  |
| tcf-miR-1       | UGGAAUGUAAAGAAGUAGGAG    | 238     | 3758                   | 6365                   | 12373                  | 15609                  | 17187  | 9255.0       | 4                  |
| tcf-miR-2a-5p   | CUCACAAAGUGGCUGUCAUGUG   | 5       | 265                    | 447                    | 718                    | 887                    | 110    | 405.3        | 4                  |
| tcf-miR-2a-3p   | UAUCACAGCCAGCUUUGAUGAG   | 431     | 1471                   | 2672                   | 5055                   | 5483                   | 864    | 2662.7       | 4                  |
| tcf-miR-2a-2    | UAUCACAGCCAGCUUUGAUGAG   | 431     | 1471                   | 2672                   | 5055                   | 5483                   | 864    | 2662.7       | 4                  |
| tcf-miR-2b      | UAUCACAGCCAGCUUUGAUGAG   | 1456    | 3382                   | 6701                   | 13389                  | 14353                  | 2720   | 7000.2       | 3                  |
| tcf-miR-7       | UGGAAGACUAGUAGUUUUGUUGU  | 36      | 121                    | 260                    | 668                    | 965                    | 225    | 379.2        | 3                  |
| tcf-miR-8-5p    | CAUCUUACCCGGCAGCAUUGA    | 254     | 1209                   | 2957                   | 3799                   | 4084                   | 6348   | 3108.5       | 4                  |
| tcf-miR-8-3p    | UAUAUCUGUCAGGUAAGAUUGUC  | 9057    | 15144                  | 36306                  | 105985                 | 117144                 | 244410 | 88007.7      | 4                  |
| tcf-miR-9a-5p   | UCUUUGGUUUAUCUAGCUUAUGA  | 3833    | 5753                   | 10456                  | 19403                  | 19433                  | 19321  | 13033.2      | 4                  |
| tcf-miR-9a-3p   | AUAAAGCUAGGUUACCAAAGUU   | 20      | 18                     | 44                     | 165                    | 79                     | 127    | 75.5         | 4                  |
| tcf-miR-9b-5p   | UCUUUGGUGGUCUAGCUGUAUGA  | 2788    | 880                    | 1291                   | 843                    | 394                    | 220    | 1069.3       | 4                  |
| tcf-miR-9b-3p   | AUAAAGCUAGUAGCAAGCAAGG   | 1578    | 2687                   | 1629                   | 1978                   | 1533                   | 125    | 1588.3       | 4                  |
| tcf-miR-10-5p   | UACCCUGUAGUACCGAAUUUGU   | 13950   | 147193                 | 584564                 | 499716                 | 1127757                | 379788 | 458828.0     | 4                  |
| tcf-miR-10-3p   | CAAAUUCGGUUUAGAGAGGCUUC  | 206     | 1763                   | 3310                   | 4235                   | 4826                   | 4303   | 3107.2       | 3                  |
| tcf-miR-12      | UGAGUUAUUAUCAGGUAUCUGU   | 11076   | 66920                  | 53056                  | 141652                 | 85565                  | 104791 | 77176.7      | 4                  |
| tcf-miR-13      | UAUCACAGCCAUUCUUGAUGAG   | 342     | 1417                   | 2516                   | 4388                   | 5270                   | 435    | 2394.7       | 4                  |
| tcf-miR-31      | AGGCAAGAUUGCGGCAUUGCU    | 153     | 2625                   | 5047                   | 8976                   | 15182                  | 32874  | 10809.5      | 4                  |
| tcf-miR-33      | GUGCAUUGUAGUUGCAUUGCA    | 8       | 23                     | 52                     | 69                     | 162                    | 86     | 66.7         | 4                  |
| tcf-miR-34      | UGGCAGUGGUAUUGCUGUUGU    | 22323   | 75                     | 63                     | 64                     | 88                     | 389    | 3833.7       | 4                  |
| tcf-miR-61      | UGACUAGAUCCAUACUACCCAG   | 5578    | 52820                  | 94316                  | 121020                 | 140716                 | 31063  | 74252.2      | 4                  |
| tcf-miR-71-5p   | UGAAAGACUAGGUGAGUAGAGU   | 340     | 1719                   | 3143                   | 4203                   | 5661                   | 1051   | 2686.2       | 4                  |
| tcf-miR-71-3p   | UCUCACUUAUCUUGUCGUUCAUG  | 1129    | 3416                   | 4578                   | 9529                   | 10295                  | 2344   | 5215.2       | 4                  |
| tcf-miR-87      | UUGAGCAAAGCUACAGGUGCGU   | 1787    | 8427                   | 11635                  | 23019                  | 25062                  | 37880  | 17968.3      | 4                  |
| tcf-miR-92a     | UAUUGCACUCGUCGCGGCUUGU   | 11090   | 119532                 | 112208                 | 98046                  | 74381                  | 23387  | 73107.3      | 4                  |
| tcf-miR-92b     | AAUUGCACUUGUCCCGGCUUGC   | 6898    | 74004                  | 75245                  | 65076                  | 55903                  | 19824  | 49491.7      | 4                  |
| tcf-miR-96      | UUUGGCACUAGCACAUUUUUGU   | 140     | 329                    | 1115                   | 1409                   | 3758                   | 1216   | 1327.8       | 4                  |
| tcf-miR-100     | AACCCGUAUAGUCCGAACUUGUG  | 14      | 800                    | 4197                   | 6453                   | 15434                  | 21586  | 8080.7       | 4                  |
| tcf-miR-124-5p  | CGUUGUACUUGUUGGCUUAGUAG  | 0       | 334                    | 811                    | 1507                   | 1770                   | 29     | 741.8        | 3                  |
| tcf-miR-124-3p  | UAAGGCACGCGGUAUUGCCAA    | 0       | 37                     | 77                     | 219                    | 366                    | 19     | 119.7        | 3                  |
| tcf-miR-125     | UCCUUGAGACCUCUUAUCUUGUGA | 27      | 440                    | 1300                   | 2626                   | 5340                   | 10645  | 3396.3       | 4                  |
| tcf-miR-133     | UUUGUCCCUUAACCCAGCUUGU   | 13      | 1538                   | 2612                   | 6232                   | 6842                   | 4411   | 3608.0       | 4                  |
| tcf-miR-137     | UUUUUUCUUGAGAAUACACGU    | 0       | 15                     | 46                     | 100                    | 177                    | 91     | 71.5         | 4                  |
| tcf-miR-153-5p  | UCAUUUUUGUUAUUUUUGCAAUU  | 0       | 0                      | 0                      | 0                      | 11                     | 11     | 3.2          | 4                  |
| tcf-miR-153-3p  | UUGCAUAGUCACAAAAGUAGUAG  | 29      | 87                     | 239                    | 641                    | 1470                   | 4698   | 1194.0       | 4                  |
| tcf-miR-184-5p  | CCUUAUCAUUCACAGUCGCGG    | 0       | 10                     | 13                     | 26                     | 31                     | 17     | 16.2         | 4                  |
| tcf-miR-184-3p  | UGGACGGAGAACUAGUAAAGGGC  | 125505  | 780841                 | 746145                 | 838107                 | 975769                 | 838326 | 717448.8     | 4                  |
| tcf-miR-190     | AGAUUUGUUUAGUUAUUUUUGUUG | 122     | 176                    | 297                    | 898                    | 1056                   | 1300   | 641.5        | 4                  |
| tcf-miR-193     | UACUGGCCUGCUAAGUCCCAAG   | 0       | 226                    | 864                    | 2754                   | 3720                   | 2760   | 1720.7       | 4                  |
| tcf-miR-210-5p  | AGCUGCUGACACUAGCUCAAGAU  | 0       | 38                     | 48                     | 73                     | 112                    | 190    | 76.8         | 4                  |
| tcf-miR-210-3p  | CUUGUGCUGUAGCAGCGGCUUG   | 18      | 20                     | 70                     | 149                    | 363                    | 671    | 215.2        | 4                  |
| tcf-miR-219     | UGAUUGUCCAACGCAAUUUCUUG  | 0       | 50                     | 53                     | 93                     | 79                     | 0      | 45.8         | 4                  |
| tcf-miR-252a-5p | UAAGUACUAGUGCCGCGAGGAG   | 23      | 103                    | 245                    | 766                    | 945                    | 3662   | 957.3        | 4                  |
| tcf-miR-252a-3p | UCCUGCAGCUAUGUGCUUACCC   | 0       | 5                      | 13                     | 29                     | 22                     | 44     | 18.8         | 4                  |
| tcf-miR-252b    | CUAAGUAGUUGUGCCGCGAGGUA  | 0       | 110                    | 309                    | 677                    | 774                    | 1049   | 486.5        | 4                  |
| tcf-miR-263a    | AAUGGCACUGGAAGAAUUCACGGG | 3021    | 7125                   | 35687                  | 27734                  | 65163                  | 16552  | 25880.3      | 4                  |
| tcf-miR-263b    | CUUGGCACUGGAAGAAUUCACAGA | 186     | 554                    | 2538                   | 2841                   | 6824                   | 2255   | 2533.0       | 4                  |
| tcf-miR-275     | UCAGGUACCUAAGUAGCGCGC    | 8559    | 28360                  | 46715                  | 45526                  | 32406                  | 12538  | 29017.3      | 4                  |
| tcf-miR-276-5p  | AGCGAGGUUAUAGUUCUUCUACG  | 0       | 10                     | 33                     | 78                     | 125                    | 49     | 49.2         | 4                  |
| tcf-miR-276-3p  | UAGGAACUUAUCUACCCGUCUCU  | 2225    | 20586                  | 67272                  | 219025                 | 301011                 | 275009 | 147521.3     | 4                  |
| tcf-miR-277     | UAAUUGCAUUUUCUGGUUAGUUC  | 1155    | 231                    | 516                    | 892                    | 1356                   | 1812   | 993.7        | 4                  |
| tcf-miR-278     | UCGUGGGAAUUUCGUCGCUUG    | 0       | 33                     | 65                     | 131                    | 160                    | 166    | 92.5         | 4                  |
| tcf-miR-279a    | UGACUAGAUCCACACUCAUCCA   | 5306    | 29898                  | 54580                  | 90741                  | 88716                  | 20710  | 48325.2      | 4                  |
| tcf-miR-279b    | UGACUAGAUCCAUCAUCAUCU    | 5604    | 9781                   | 21339                  | 36678                  | 51644                  | 46649  | 28682.5      | 4                  |
| tcf-miR-279c    | UGACUAGAUCCACACUCAUCCA   | 4836    | 886                    | 713                    | 404                    | 188                    | 146    | 1195.5       | 4                  |
| tcf-miR-279d    | UGACUAGAUCCACACUCAUCCA   | 123     | 236                    | 445                    | 1283                   | 852                    | 628    | 594.5        | 4                  |
| tcf-miR-279e    | UGACUAGAUCCAUCAUCUCCGUCC | 118     | 99                     | 101                    | 105                    | 80                     | 0      | 83.8         | 4                  |
| tcf-miR-281-5p  | AAGAGAGCUAUCGUCGACAGU    | 3854    | 43816                  | 52395                  | 85978                  | 124278                 | 54417  | 60789.7      | 4                  |
| tcf-miR-281-3p  | UGUCAUGGAGCUGUCUUCUUUA   | 78      | 512                    | 781                    | 2022                   | 2048                   | 780    | 1036.8       | 4                  |
| tcf-miR-282     | UAGCCUUCUAGGCUUUUGUCU    | 6       | 17                     | 31                     | 65                     | 152                    | 173    | 74.0         | 3                  |
| tcf-miR-283     | AAAUUUCAGCAGGAAUUCUGGGC  | 461     | 1849                   | 4438                   | 10030                  | 9893                   | 6060   | 5455.2       | 4                  |
| tcf-miR-285     | UAGACCAUUGGAAUUCAGUUUA   | 17      | 65                     | 186                    | 279                    | 677                    | 185    | 234.8        | 4                  |
| tcf-miR-305     | AUUGUACUUAUCAGGUGCUCUGG  | 522     | 1743                   | 2053                   | 3881                   | 1795                   | 1312   | 1884.3       | 4                  |
| tcf-miR-307     | UCACAACCCUUCUAGUAGUAGUG  | 29      | 217                    | 3427                   | 3742                   | 3555                   | 2061   | 2488.5       | 4                  |
| tcf-miR-315-5p  | UUUUGAUUUGUUCUCAGAAAGCC  | 325     | 18356                  | 42306                  | 113690                 | 159939                 | 77117  | 68622.2      | 4                  |
| tcf-miR-315-3p  | CUUUCGAGUAAACUAGAGUCU    | 0       | 14                     | 37                     | 46                     | 38                     | 0      | 22.5         | 4                  |
| tcf-miR-317     | UGAACACAGCUGUUGUUAUCU    | 18      | 564                    | 1631                   | 1620                   | 3326                   | 5022   | 2030.2       | 3                  |
| tcf-miR-375     | UUUGUUCUUCGGCUCGAGUUA    | 115     | 3366                   | 6503                   | 10298                  | 10372                  | 20126  | 8463.3       | 4                  |
| tcf-miR-745     | GAGCUGCCAGGUAAGGGCUUUC   | 0       | 26                     | 30                     | 67                     | 74                     | 228    | 70.8         | 4                  |
| tcf-miR-750     | CCAGAUUCUUCUUCAGCUCUCA   | 472     | 6053                   | 10705                  | 16024                  | 14614                  | 13494  | 10227.0      | 4                  |
| tcf-miR-965     | UAAGCGUAGGCUUUUCCCGUCG   | 561     | 718                    | 1344                   | 2240                   | 2197                   | 250    | 1218.3       | 4                  |
| tcf-miR-981     | UUCGUUUCGACGAAACUUCGAC   | 112     | 662                    | 1076                   | 2805                   | 3576                   | 2337   | 1761.3       | 4                  |
| tcf-miR-993-5p  | CUACCCUGGUAUCCGGGCUUUU   | 174     | 1048                   | 887                    | 1633                   | 1975                   | 2047   | 1294.0       | 3                  |
| tcf-miR-993-3p  | GAAGCUCGUCUACAGGUAUCU    | 617     | 4059                   | 6597                   | 11014                  | 12086                  | 11759  | 7688.7       | 3                  |
| tcf-miR-995     | UAGCACACAGGAAUUCAGUU     | 13      | 67                     | 179                    | 109                    | 175                    | 53     | 99.3         | 4                  |
| tcf-miR-996     | UGACUAGAUUACACUCAUCU     | 161     | 115                    | 280                    | 463                    | 576                    | 1595   | 531.7        | 4                  |
| tcf-miR-998     | UAGCACACGGGAUUCAGCCGC    | 131     | 222                    | 74                     | 25                     | 42                     | 29     | 53.8         | 3                  |
| tcf-miR-1175-5p | AAGUGGAGCAGUAGUCUGUCACU  | 89      | 15454                  | 26966                  | 20523                  | 23449                  | 12212  | 16448.8      | 4                  |
| tcf-miR-1175-3p | UGAGAUUCAAUCUCCCAACUUUG  | 99      | 270                    | 531                    | 1028                   | 958                    | 2539   | 904.2        | 4                  |
| tcf-miR-2788    | CAAUGCCUGAGAAUUCAGCA     | 0       | 50                     | 729                    | 507                    | 2732                   | 920    | 823.0        | 4                  |
| tcf-miR-2944    | UAUCACAGCCGUAUUCUUAUGA   | 10898   | 6694                   | 11530                  | 8236                   | 6174                   | 962    | 7415.7       | 4                  |
| tcf-miR-3477    | UAUCUCAUCGCGUAUCUCUGAGA  | 589     | 15297                  | 22305                  | 23198                  | 24658                  | 24459  | 18417.7      | 4                  |
| tcf-miR-3791    | UCACCGGUAAGAAUUCUACCCAG  | 1825700 | 35480                  | 70510                  | 41510                  | 48868                  | 62798  | 347477.7     | 4                  |
| tcf-miR-5608    | UUUUUUCGACCGGUCGUAUCUGUA | 0       | 7                      | 15                     | 15                     | 43                     | 0      | 13.3         | 3                  |
| tcf-miR-iab-4   | ACGUUAUCGAAUUGUACCCGA    | 0       | 371                    | 607                    | 824                    | 880                    | 247    | 488.2        | 3                  |
| tcf-miR-iab-8   | UACGUUAUCGAAUUGUACCCGA   | 0       | 0                      | 5                      | 47                     | 68                     | 68     | 31.3         | 4                  |

\*Reliability level; see the main text in details.



**Table S4. Nucleotide sequences of novel candidate miRNAs in *T. cancriformis* and their read numbers for each developmental stage**

| miRNA name     | miRNA sequence            | Egg   | 1 <sup>st</sup> Instar | 2 <sup>nd</sup> Instar | 3 <sup>rd</sup> Instar | 4 <sup>th</sup> Instar | Adult | Average read | Reliability level |
|----------------|---------------------------|-------|------------------------|------------------------|------------------------|------------------------|-------|--------------|-------------------|
| tcf-miR-n501   | ACUUGGUUUAUUGAUUGACAGCU   | 15230 | 23048                  | 40512                  | 54129                  | 60082                  | 33266 | 37711.2      | 4                 |
| tcf-miR-n502   | UCACUGGGUCCGGUUCUACUCCUG  | 34665 | 1873                   | 2582                   | 1750                   | 1473                   | 1324  | 7277.8       | 4                 |
| tcf-miR-n503   | UUGCACUUAUUGGUUUCAGGGCGA  | 29350 | 322                    | 372                    | 313                    | 282                    | 9934  | 6762.2       | 4                 |
| tcf-miR-n504   | UUGCACUUAACCGGUUUGGGGCUU  | 34766 | 918                    | 832                    | 601                    | 343                    | 94    | 6259.0       | 4                 |
| tcf-miR-n505   | GUGAGCAAUAUCAGGUGCGGU     | 90    | 1083                   | 1994                   | 3485                   | 4599                   | 4285  | 2589.3       | 4                 |
| tcf-miR-n506   | UUGGUUUGAGAUAGUGGACCCG    | 263   | 837                    | 1347                   | 1632                   | 2145                   | 5370  | 1932.3       | 3                 |
| tcf-miR-n507   | AUCGGCACUGGGUUAACAUGAA    | 120   | 852                    | 1950                   | 1281                   | 2877                   | 3201  | 1713.5       | 4                 |
| tcf-miR-n508   | UGUGAUGGUUUUAUUAACAUCUAGU | 8     | 0                      | 0                      | 0                      | 0                      | 9589  | 1599.5       | 4                 |
| tcf-miR-n509   | AAGGAACACUUGUCUGGUUAUG    | 441   | 1032                   | 1852                   | 2301                   | 1745                   | 1473  | 1474.0       | 4                 |
| tcf-miR-n510   | UGAGAUCAACCUUAGUAGCAU     | 1183  | 714                    | 1435                   | 743                    | 961                    | 3535  | 1428.5       | 4                 |
| tcf-miR-n511   | UCUUGGUUUAUGGUGAAAUGG     | 174   | 1090                   | 1083                   | 509                    | 542                    | 143   | 623.5        | 4                 |
| tcf-miR-n512   | UUGCACUGGGUUCGGGGGGU      | 3639  | 5                      | 22                     | 10                     | 28                     | 18    | 620.3        | 4                 |
| tcf-miR-n513   | UGUCUUUUCGGUUGACUGCCG     | 0     | 105                    | 276                    | 657                    | 966                    | 1019  | 503.8        | 4                 |
| tcf-miR-n514   | GUAGAAGUUUUCGCCACCCUGAA   | 35    | 315                    | 466                    | 378                    | 754                    | 227   | 362.5        | 4                 |
| tcf-miR-n515   | AUAUAUUGCGAGGUGCAGAUA     | 118   | 112                    | 207                    | 370                    | 396                    | 257   | 243.3        | 4                 |
| tcf-miR-n516   | UCGGUUAUUUUCUUCUUCU       | 33    | 85                     | 216                    | 328                    | 410                    | 177   | 208.2        | 4                 |
| tcf-miR-n517   | UUGGUCCCGAGCGUAGAUAGCG    | 148   | 283                    | 268                    | 223                    | 193                    | 27    | 190.3        | 2                 |
| tcf-miR-n518   | CUAAAGCUAAGCCACCAAGAGG    | 479   | 151                    | 166                    | 194                    | 100                    | 27    | 186.2        | 4                 |
| tcf-miR-n519   | UCCAUAGGCUCCCAACGAACCU    | 56    | 353                    | 348                    | 126                    | 169                    | 30    | 180.3        | 2                 |
| tcf-miR-n520   | UCACUGGGUUGGUUUUAUCCG     | 744   | 19                     | 45                     | 49                     | 47                     | 0     | 150.7        | 4                 |
| tcf-miR-n521   | UCACUGGGUUAAGGUUCGCCCGG   | 610   | 10                     | 12                     | 10                     | 21                     | 88    | 125.4        | 4                 |
| tcf-miR-n522   | UGUGAUGAUAGGUGGGAGGU      | 705   | 0                      | 0                      | 0                      | 0                      | 0     | 117.5        | 2                 |
| tcf-miR-n523   | UAAGCAGCAUCGGGCUUGGUGAC   | 69    | 234                    | 116                    | 88                     | 80                     | 49    | 106.0        | 3                 |
| tcf-miR-n524   | UGCAAGGCUUUUCUUCUACGGUC   | 88    | 145                    | 127                    | 130                    | 91                     | 30    | 101.8        | 3                 |
| tcf-miR-n525   | UUGGUCUGUUAACGCUUUUACACC  | 51    | 142                    | 171                    | 116                    | 118                    | 9     | 101.2        | 2                 |
| tcf-miR-n526   | UUCGUAUUUUUAGCAUUAUUG     | 0     | 0                      | 5                      | 17                     | 20                     | 551   | 98.8         | 4                 |
| tcf-miR-n527   | UCACCAGGUGAGAUUCAUCCAU    | 246   | 80                     | 100                    | 53                     | 53                     | 10    | 90.3         | 4                 |
| tcf-miR-n528   | UCUCGCAAAUUCUUGCCUCGUCG   | 28    | 128                    | 181                    | 63                     | 87                     | 53    | 90.0         | 4                 |
| tcf-miR-n529   | AAUGUCCAAUUAUAGAAUUAU     | 21    | 29                     | 82                     | 93                     | 119                    | 191   | 89.2         | 2                 |
| tcf-miR-n530   | AAGAACAAGUUCGGGCUUGAGACU  | 64    | 109                    | 149                    | 108                    | 85                     | 19    | 89.0         | 3                 |
| tcf-miR-n531   | UCGUUAJACGAGCCGGGUCUC     | 32    | 60                     | 80                     | 102                    | 113                    | 26    | 68.8         | 4                 |
| tcf-miR-n531-2 | UCGUUAJACGAGCCGGGUCUC     | 32    | 60                     | 80                     | 102                    | 113                    | 26    | 68.8         | 4                 |
| tcf-miR-n532   | CUACAUAGGUUAUCUCACCG      | 96    | 64                     | 75                     | 99                     | 43                     | 27    | 67.3         | 4                 |
| tcf-miR-n533   | CUGGGCAACAAGGUAUUAUUAU    | 11    | 34                     | 69                     | 61                     | 68                     | 44    | 47.8         | 4                 |
| tcf-miR-n534   | CAUUCUUGUAGGAGUAUACCU     | 20    | 39                     | 45                     | 38                     | 47                     | 21    | 35.0         | 4                 |
| tcf-miR-n535   | UUGCACUGGGGUGCCAGGGUU     | 169   | 5                      | 9                      | 7                      | 7                      | 12    | 34.8         | 4                 |
| tcf-miR-n536   | GCAAGAAACAAGUCCGAAUUCGGA  | 28    | 52                     | 36                     | 40                     | 27                     | 24    | 34.5         | 4                 |
| tcf-miR-n537   | UUGCACUGGCUAGCCAGGGGA     | 196   | 0                      | 0                      | 0                      | 0                      | 0     | 32.7         | 4                 |
| tcf-miR-n538   | UUUUUUAACAAGCGGUUACUG     | 19    | 37                     | 36                     | 28                     | 32                     | 18    | 28.3         | 4                 |
| tcf-miR-n539   | UCUGAACAAGGUAUCGACUCAGU   | 10    | 40                     | 36                     | 37                     | 30                     | 5     | 26.3         | 3                 |
| tcf-miR-n540   | UCAACAUCUGUAACUCAGCCU     | 6     | 36                     | 39                     | 17                     | 23                     | 33    | 25.7         | 1                 |
| tcf-miR-n541   | UUUGAAAACUCAGUGCCGACU     | 0     | 0                      | 10                     | 7                      | 17                     | 116   | 25.0         | 4                 |
| tcf-miR-n542   | CUUCCAUAAGGUUCUACUUAU     | 5     | 13                     | 27                     | 31                     | 35                     | 19    | 21.7         | 4                 |
| tcf-miR-n543   | UCUGAUUCUGAUUUUUUUAUCC    | 14    | 26                     | 23                     | 23                     | 14                     | 11    | 18.5         | 4                 |
| tcf-miR-n544   | UUGGAUJAGAGGUAUUCGCGCCU   | 16    | 27                     | 14                     | 8                      | 11                     | 34    | 18.3         | 4                 |
| tcf-miR-n545   | UGUGUCUUGGUCUGGUCUGUCU    | 0     | 17                     | 18                     | 36                     | 28                     | 6     | 17.5         | 4                 |
| tcf-miR-n546   | GUACGGUUUUUCAGGGAGUCCGU   | 30    | 32                     | 19                     | 13                     | 0                      | 10    | 17.3         | 3                 |
| tcf-miR-n547   | UGCACUUAUCGACUUAUCUGCCA   | 0     | 8                      | 10                     | 26                     | 30                     | 30    | 17.3         | 4                 |
| tcf-miR-n548   | UAUGAACUGGUCUUCUGGUCACGU  | 6     | 13                     | 22                     | 28                     | 26                     | 8     | 17.2         | 2                 |
| tcf-miR-n549   | AUGCGGACAAGGGUUUUGACAUU   | 6     | 25                     | 31                     | 19                     | 15                     | 0     | 16.0         | 4                 |
| tcf-miR-n550   | UAAGAACGAGAACACUCAGAAACC  | 12    | 12                     | 25                     | 21                     | 15                     | 11    | 16.0         | 3                 |
| tcf-miR-n551   | UCGACCAGUACUCGUCACGGCACC  | 5     | 22                     | 41                     | 20                     | 6                      | 0     | 15.7         | 4                 |
| tcf-miR-n552   | UAUCAUCGUCUUCUUAUGGAGGCU  | 13    | 10                     | 28                     | 22                     | 19                     | 0     | 15.3         | 2                 |
| tcf-miR-n553   | UGUAUAGUACUCCGCAUAAAA     | 29    | 6                      | 17                     | 26                     | 14                     | 0     | 15.3         | 4                 |
| tcf-miR-n554   | UUUUGGUGAUUCGGAUGCAAGC    | 9     | 26                     | 26                     | 6                      | 11                     | 12    | 15.0         | 3                 |
| tcf-miR-n555   | UUCUCUCCCGGACUCUUCUUGGUC  | 10    | 25                     | 22                     | 13                     | 14                     | 0     | 14.0         | 3                 |
| tcf-miR-n556   | CAAGGAAAAGGUUAUUAUUAACC   | 0     | 0                      | 5                      | 8                      | 11                     | 53    | 12.8         | 3                 |
| tcf-miR-n557   | CUUUUUAUUGCGCGGUUCUAGC    | 0     | 9                      | 6                      | 0                      | 9                      | 50    | 12.3         | 4                 |
| tcf-miR-n558   | UAGGUCUGUCGCAACCGGAGCC    | 10    | 24                     | 15                     | 11                     | 0                      | 11    | 11.8         | 4                 |
| tcf-miR-n559   | UGGUGACAGAAUUCUUAAGAA     | 0     | 6                      | 18                     | 15                     | 32                     | 0     | 11.8         | 3                 |
| tcf-miR-n560   | AGAAGUCUUUAGCGAAGGAGACUU  | 9     | 12                     | 11                     | 24                     | 13                     | 0     | 11.5         | 4                 |
| tcf-miR-n561   | CCCCGUGAAGUCUGGAUUUUUA    | 0     | 21                     | 21                     | 12                     | 8                      | 7     | 11.5         | 3                 |
| tcf-miR-n562   | UAAAGAUUUGACAAGGUGGGUAGC  | 15    | 7                      | 18                     | 7                      | 13                     | 5     | 10.8         | 4                 |
| tcf-miR-n563   | UAAAAACCACAUUCGGAUUUG     | 11    | 13                     | 22                     | 17                     | 0                      | 0     | 10.5         | 4                 |
| tcf-miR-n564   | GAAUUGUCCCGUUGUUUGGG      | 0     | 10                     | 13                     | 11                     | 16                     | 12    | 10.3         | 4                 |
| tcf-miR-n565   | UUGUCGAGUAGAUACUUAUUGGC   | 12    | 17                     | 0                      | 14                     | 12                     | 7     | 10.3         | 4                 |
| tcf-miR-n566   | AACCAGGCUAGGUGUUCAGCAGGA  | 0     | 0                      | 0                      | 7                      | 36                     | 16    | 9.8          | 3                 |
| tcf-miR-n567   | UAGGAUCGUUUAACAAGUACAGUC  | 10    | 15                     | 13                     | 9                      | 7                      | 5     | 9.8          | 3                 |
| tcf-miR-n568   | UAAGCUCUACGUCUGGAGGCAUCC  | 5     | 9                      | 17                     | 10                     | 15                     | 0     | 9.3          | 3                 |
| tcf-miR-n569   | AUUGGACCUAGAUUCGGAACGCG   | 0     | 13                     | 20                     | 6                      | 8                      | 7     | 9.0          | 2                 |
| tcf-miR-n570   | UAGGGAUUAGUGCAGAGGUCUA    | 7     | 15                     | 8                      | 9                      | 8                      | 7     | 9.0          | 4                 |
| tcf-miR-n571   | UUCAAGGUUUGCGCUCUGCAACU   | 0     | 0                      | 10                     | 0                      | 9                      | 35    | 9.0          | 4                 |
| tcf-miR-n572   | UUGGUCGGAUUAUGGGAUUUUUCU  | 0     | 12                     | 15                     | 7                      | 9                      | 7     | 8.3          | 3                 |
| tcf-miR-n573   | UGAGUCGACACGGGAACCGAAC    | 5     | 19                     | 10                     | 9                      | 5                      | 0     | 8.0          | 2                 |
| tcf-miR-n574   | ACUGAGAACGGUUCGAGUCGACU   | 0     | 15                     | 7                      | 5                      | 14                     | 5     | 7.7          | 4                 |
| tcf-miR-n575   | AGCGUCUGACGGUUAUCUGAAA    | 0     | 6                      | 0                      | 0                      | 0                      | 40    | 7.7          | 4                 |
| tcf-miR-n576   | CGAUCGACGACUCGGAAGAUUGCCA | 6     | 0                      | 5                      | 9                      | 8                      | 16    | 7.3          | 3                 |
| tcf-miR-n576-2 | CGAUCGACGACUCGGAAGAUUGCCA | 6     | 0                      | 5                      | 9                      | 8                      | 16    | 7.3          | 4                 |
| tcf-miR-n577   | UGGGUAGACUCUCCAUCAUUCGU   | 14    | 0                      | 10                     | 14                     | 5                      | 0     | 7.2          | 4                 |
| tcf-miR-n578   | UCCGCCAUACGUGAGGGAUUG     | 6     | 11                     | 11                     | 8                      | 6                      | 0     | 7.0          | 4                 |
| tcf-miR-n579   | GUUAACAACAGGUGUAGGGCUAA   | 0     | 0                      | 14                     | 12                     | 8                      | 5     | 6.5          | 4                 |
| tcf-miR-n580   | UUUCGAAUUCGAACUUUGUUUU    | 0     | 0                      | 5                      | 12                     | 16                     | 6     | 6.5          | 4                 |
| tcf-miR-n581   | AGGUCCUGGUUCGAGUCC        | 36    | 0                      | 0                      | 0                      | 0                      | 0     | 6.0          | 4                 |
| tcf-miR-n581-2 | AGGUCCUGGUUCGAGUCC        | 36    | 0                      | 0                      | 0                      | 0                      | 0     | 6.0          | 4                 |
| tcf-miR-n582   | AAUAACAUCGAGGUGGUUU       | 0     | 0                      | 0                      | 0                      | 0                      | 35    | 5.8          | 4                 |
| tcf-miR-n582-2 | AAUAACAUCGAGGUGGUUU       | 0     | 0                      | 0                      | 0                      | 0                      | 35    | 5.8          | 4                 |
| tcf-miR-n583   | GAACGGUCCGAGUCGACUCGCU    | 0     | 0                      | 0                      | 8                      | 12                     | 15    | 5.8          | 2                 |
| tcf-miR-n584   | UAGGUCUUGGAUUCUUGUUCU     | 13    | 0                      | 6                      | 9                      | 6                      | 0     | 5.7          | 2                 |
| tcf-miR-n585   | UUACGUUUUCGAGGUGGCCCC     | 0     | 8                      | 13                     | 6                      | 7                      | 0     | 5.7          | 2                 |
| tcf-miR-n585-2 | UUACGUUUUCGAGGUGGCCCC     | 0     | 8                      | 13                     | 6                      | 7                      | 0     | 5.7          | 2                 |
| tcf-miR-n586   | UCGAGAUUUUCGCGGUCU        | 0     | 0                      | 5                      | 10                     | 10                     | 8     | 5.5          | 4                 |
| tcf-miR-n587   | UGAGCACAUAAGCACACGAGACU   | 0     | 8                      | 13                     | 6                      | 5                      | 0     | 5.3          | 4                 |
| tcf-miR-n588   | UACGGCUAAGGGAACCUUUUCC    | 0     | 0                      | 5                      | 5                      | 10                     | 11    | 5.2          | 4                 |
| tcf-miR-n589   | ACAGAUUAUCGAGCGGAGAUUCG   | 0     | 10                     | 12                     | 0                      | 8                      | 0     | 5.0          | 4                 |
| tcf-miR-n590   | CUUCUUUUCGUCUGUCUCCGGU    | 0     | 11                     | 9                      | 10                     | 0                      | 0     | 5.0          | 4                 |
| tcf-miR-n591   | AUUUUUUGAGAUUAGUGACCC     | 0     | 0                      | 0                      | 0                      | 0                      | 28    | 4.7          | 3                 |
| tcf-miR-n592   | UCCGAGAUCCGUCGAAUCGGGAUC  | 0     | 8                      | 9                      | 0                      | 5                      | 5     | 4.5          | 4                 |
| tcf-miR-n593   | UGCAAUGGGUCGACUCGAGACU    | 6     | 8                      | 5                      | 0                      | 8                      | 0     | 4.5          | 4                 |

<sup>a</sup>Reliability level; see the main text in details.



**Table S6. Normalization of small RNA reads in this study**

|                                | <b>Egg</b>         | <b>1<sup>st</sup> Instar</b> | <b>2<sup>nd</sup> Instar</b> | <b>3<sup>rd</sup> Instar</b> | <b>4<sup>th</sup> Instar</b> | <b>Adult</b>       |
|--------------------------------|--------------------|------------------------------|------------------------------|------------------------------|------------------------------|--------------------|
| Spike1                         | 28,746             | 30,235                       | 36,053                       | 61,382                       | 42,651                       | 54,232             |
| Spike2                         | 2,150              | 3,143                        | 3,545                        | 6,407                        | 4,063                        | 4,264              |
| Spike1/Spike2                  | 13.4               | 9.6                          | 10.2                         | 9.6                          | 10.5                         | 12.7               |
| <b>Fold change to standard</b> | <b>1.432395941</b> | <b>1.155164531</b>           | <b>0.996075363</b>           | <b>0.567836288</b>           | <b>0.855427095</b>           | <b>0.740516285</b> |
| Total small RNA reads          | 23,438,746         | 15,019,413                   | 20,078,802                   | 17,921,148                   | 21,597,504                   | 22,625,712         |
| Normalized small RNA reads     | 33,573,565         | 17,349,893                   | 20,000,000                   | 10,176,278                   | 18,475,090                   | 16,754,708         |

**Table S7. Normalized relative expression of conserved miRNAs in *T. cancriformis***

| miRNA name      | Egg      | 1 <sup>st</sup> Instar | 2 <sup>nd</sup> Instar | 3 <sup>rd</sup> Instar | 4 <sup>th</sup> Instar | Adult    |
|-----------------|----------|------------------------|------------------------|------------------------|------------------------|----------|
| tcf-bantam      | 0.057121 | 0.104927               | 0.121672               | 0.167790               | 0.304315               | 0.244175 |
| tcf-let-7-3p    | 0.000000 | 0.032283               | 0.068328               | 0.124791               | 0.164087               | 0.610511 |
| tcf-let-7-5p    | 0.001179 | 0.007195               | 0.024495               | 0.053396               | 0.139872               | 0.773864 |
| tcf-miR-1       | 0.007726 | 0.098377               | 0.143675               | 0.159217               | 0.302586               | 0.288420 |
| tcf-miR-2a-5p   | 0.003569 | 0.152567               | 0.221907               | 0.203198               | 0.378162               | 0.040597 |
| tcf-miR-2a-3p   | 0.046846 | 0.128939               | 0.201956               | 0.217808               | 0.355902               | 0.048549 |
| tcf-miR-2b      | 0.060343 | 0.113037               | 0.193123               | 0.219975               | 0.355245               | 0.058278 |
| tcf-miR-7       | 0.028306 | 0.076726               | 0.142161               | 0.208216               | 0.453131               | 0.091460 |
| tcf-miR-8-5p    | 0.024163 | 0.092751               | 0.195611               | 0.143266               | 0.232017               | 0.312192 |
| tcf-miR-8-3p    | 0.031796 | 0.042876               | 0.088634               | 0.147501               | 0.245602               | 0.443591 |
| tcf-miR-9a-5p   | 0.548965 | 0.139738               | 0.176769               | 0.065802               | 0.046331               | 0.022395 |
| tcf-miR-9a-3p   | 0.237579 | 0.326249               | 0.170550               | 0.118056               | 0.137836               | 0.009729 |
| tcf-miR-9b-5p   | 0.085122 | 0.103034               | 0.161473               | 0.170818               | 0.257730               | 0.221823 |
| tcf-miR-9b-3p   | 0.082183 | 0.059650               | 0.125729               | 0.268781               | 0.193866               | 0.269792 |
| tcf-miR-10-5p   | 0.008680 | 0.073863               | 0.252942               | 0.123266               | 0.419078               | 0.122172 |
| tcf-miR-10-3p   | 0.019225 | 0.132691               | 0.214815               | 0.156682               | 0.268976               | 0.207611 |
| tcf-miR-12      | 0.042055 | 0.204916               | 0.140088               | 0.213217               | 0.194024               | 0.205700 |
| tcf-miR-13      | 0.040978 | 0.136922               | 0.209634               | 0.208424               | 0.377097               | 0.026945 |
| tcf-miR-31      | 0.004322 | 0.059801               | 0.099143               | 0.100518               | 0.256123               | 0.480092 |
| tcf-miR-33      | 0.034592 | 0.080203               | 0.156356               | 0.118275               | 0.418329               | 0.192244 |
| tcf-miR-34      | 0.983118 | 0.002664               | 0.001929               | 0.001117               | 0.002314               | 0.008857 |
| tcf-miR-61      | 0.021304 | 0.162689               | 0.250492               | 0.183230               | 0.320953               | 0.061333 |
| tcf-miR-71-5p   | 0.035781 | 0.145893               | 0.230012               | 0.175346               | 0.355787               | 0.057181 |
| tcf-miR-71-3p   | 0.062016 | 0.151325               | 0.174871               | 0.207501               | 0.337722               | 0.066564 |
| tcf-miR-87      | 0.029611 | 0.112611               | 0.134067               | 0.151208               | 0.248007               | 0.324496 |
| tcf-miR-92a     | 0.039481 | 0.343180               | 0.277786               | 0.138372               | 0.158139               | 0.043043 |
| tcf-miR-92b     | 0.036626 | 0.316887               | 0.277827               | 0.136978               | 0.177265               | 0.054417 |
| tcf-miR-96      | 0.030354 | 0.057527               | 0.168112               | 0.121106               | 0.486599               | 0.136301 |
| tcf-miR-100     | 0.000528 | 0.024334               | 0.110082               | 0.096487               | 0.347654               | 0.420914 |
| tcf-miR-124-5p  | 0.000000 | 0.107623               | 0.225336               | 0.238700               | 0.422350               | 0.005990 |
| tcf-miR-124-3p  | 0.000000 | 0.074859               | 0.134333               | 0.217805               | 0.548359               | 0.024643 |
| tcf-miR-125     | 0.002450 | 0.032202               | 0.082040               | 0.094473               | 0.289410               | 0.499424 |
| tcf-miR-133     | 0.001092 | 0.104171               | 0.152550               | 0.207491               | 0.343174               | 0.191522 |
| tcf-miR-137     | 0.000000 | 0.051154               | 0.135269               | 0.167638               | 0.446997               | 0.198941 |
| tcf-miR-153-5p  | 0.000000 | 0.000000               | 0.000000               | 0.000000               | 0.456560               | 0.543440 |
| tcf-miR-153-3p  | 0.007579 | 0.018338               | 0.043438               | 0.066414               | 0.229446               | 0.634785 |
| tcf-miR-184-5p  | 0.000000 | 0.147396               | 0.165226               | 0.188382               | 0.338366               | 0.160630 |
| tcf-miR-184-3p  | 0.047858 | 0.240124               | 0.197854               | 0.126693               | 0.222208               | 0.165263 |
| tcf-miR-190     | 0.057299 | 0.066663               | 0.097001               | 0.167196               | 0.296192               | 0.315649 |
| tcf-miR-193     | 0.000000 | 0.032998               | 0.108779               | 0.197664               | 0.402223               | 0.258336 |
| tcf-miR-210-5p  | 0.000000 | 0.118746               | 0.129337               | 0.112134               | 0.259174               | 0.380609 |
| tcf-miR-210-3p  | 0.025512 | 0.022860               | 0.068992               | 0.083718               | 0.307255               | 0.491662 |
| tcf-miR-219     | 0.000000 | 0.250103               | 0.228598               | 0.228671               | 0.292628               | 0.000000 |
| tcf-miR-252a-5p | 0.007572 | 0.027345               | 0.056087               | 0.099967               | 0.185788               | 0.623241 |
| tcf-miR-252a-3p | 0.000000 | 0.066700               | 0.149536               | 0.190166               | 0.217329               | 0.376269 |
| tcf-miR-252b    | 0.000000 | 0.056270               | 0.136299               | 0.170237               | 0.293201               | 0.343994 |
| tcf-miR-263a    | 0.032819 | 0.062422               | 0.269597               | 0.119439               | 0.422762               | 0.092960 |
| tcf-miR-263b    | 0.021221 | 0.050973               | 0.201358               | 0.128493               | 0.464951               | 0.133004 |
| tcf-miR-275     | 0.079399 | 0.212167               | 0.301354               | 0.167421               | 0.179530               | 0.060130 |
| tcf-miR-276-5p  | 0.000000 | 0.049807               | 0.141728               | 0.190971               | 0.461043               | 0.156451 |
| tcf-miR-276-3p  | 0.004690 | 0.034997               | 0.098616               | 0.183036               | 0.378952               | 0.299709 |
| tcf-miR-277     | 0.303924 | 0.049020               | 0.094420               | 0.093048               | 0.213090               | 0.246498 |
| tcf-miR-278     | 0.000000 | 0.087223               | 0.148142               | 0.170203               | 0.313167               | 0.281265 |
| tcf-miR-279a    | 0.031766 | 0.144352               | 0.227229               | 0.215360               | 0.317193               | 0.064099 |
| tcf-miR-279b    | 0.057121 | 0.080401               | 0.154087               | 0.148205               | 0.314368               | 0.245817 |
| tcf-miR-279c    | 0.756305 | 0.111744               | 0.077541               | 0.025047               | 0.017559               | 0.011804 |
| tcf-miR-279d    | 0.062600 | 0.096864               | 0.157492               | 0.258854               | 0.258957               | 0.165234 |
| tcf-miR-279e    | 0.330094 | 0.223342               | 0.196474               | 0.116441               | 0.133649               | 0.000000 |
| tcf-miR-281-5p  | 0.018174 | 0.166631               | 0.171815               | 0.160727               | 0.349990               | 0.132662 |
| tcf-miR-281-3p  | 0.022531 | 0.119272               | 0.156880               | 0.231541               | 0.353295               | 0.116481 |
| tcf-miR-282     | 0.024267 | 0.055450               | 0.087189               | 0.104218               | 0.367142               | 0.361733 |
| tcf-miR-283     | 0.025533 | 0.082587               | 0.170926               | 0.220219               | 0.327221               | 0.173515 |
| tcf-miR-285     | 0.021006 | 0.064771               | 0.159819               | 0.136662               | 0.499567               | 0.118176 |
| tcf-miR-305     | 0.078566 | 0.211565               | 0.214874               | 0.231563               | 0.161343               | 0.102087 |
| tcf-miR-307     | 0.003299 | 0.194199               | 0.271075               | 0.168737               | 0.241493               | 0.121198 |
| tcf-miR-315-5p  | 0.001444 | 0.065792               | 0.130752               | 0.200308               | 0.424513               | 0.177190 |
| tcf-miR-315-3p  | 0.000000 | 0.144843               | 0.330081               | 0.233942               | 0.291134               | 0.000000 |
| tcf-miR-317     | 0.002635 | 0.066577               | 0.166016               | 0.094003               | 0.290742               | 0.380027 |
| tcf-miR-375     | 0.004102 | 0.096834               | 0.161315               | 0.145628               | 0.220961               | 0.371160 |
| tcf-miR-745     | 0.000000 | 0.090985               | 0.090525               | 0.115253               | 0.191764               | 0.511473 |
| tcf-miR-750     | 0.013542 | 0.140057               | 0.213584               | 0.182257               | 0.250405               | 0.200155 |
| tcf-miR-965     | 0.127386 | 0.131482               | 0.212221               | 0.201636               | 0.297927               | 0.029348 |
| tcf-miR-981     | 0.019146 | 0.091263               | 0.127908               | 0.190085               | 0.365067               | 0.206531 |
| tcf-miR-993-5p  | 0.038487 | 0.186940               | 0.136431               | 0.143188               | 0.260883               | 0.234072 |
| tcf-miR-993-3p  | 0.023603 | 0.125221               | 0.175490               | 0.167025               | 0.276109               | 0.232552 |
| tcf-miR-995     | 0.035458 | 0.147377               | 0.339513               | 0.117859               | 0.285058               | 0.074735 |
| tcf-miR-996     | 0.089417 | 0.051507               | 0.108138               | 0.101937               | 0.191044               | 0.457956 |
| tcf-miR-998     | 0.523610 | 0.070915               | 0.205682               | 0.039613               | 0.100255               | 0.059925 |
| tcf-miR-1175-5p | 0.001489 | 0.208562               | 0.313804               | 0.136149               | 0.234346               | 0.105650 |
| tcf-miR-1175-3p | 0.033241 | 0.073111               | 0.123983               | 0.136834               | 0.192099               | 0.440731 |
| tcf-miR-2788    | 0.000000 | 0.014121               | 0.177536               | 0.070388               | 0.571387               | 0.166567 |
| tcf-miR-2944    | 0.343096 | 0.169956               | 0.252422               | 0.102789               | 0.116080               | 0.015657 |
| tcf-miR-3477    | 0.009061 | 0.189782               | 0.238616               | 0.141475               | 0.226540               | 0.194526 |
| tcf-miR-3791    | 0.921396 | 0.014440               | 0.024746               | 0.008305               | 0.014729               | 0.016385 |
| tcf-miR-5608    | 0.000000 | 0.118343               | 0.218667               | 0.124656               | 0.538334               | 0.000000 |
| tcf-miR-iab-4   | 0.000000 | 0.175875               | 0.248123               | 0.192016               | 0.308924               | 0.075062 |
| tcf-miR-iab-8   | 0.000000 | 0.000000               | 0.035525               | 0.190369               | 0.414922               | 0.359185 |

**Table S8. Normalized relative expression of novel candidate miRNAs in *T. cancriformis***

| miRNA name   | Egg      | 1 <sup>st</sup> Instar | 2 <sup>nd</sup> Instar | 3 <sup>rd</sup> Instar | 4 <sup>th</sup> Instar | Adult    |
|--------------|----------|------------------------|------------------------|------------------------|------------------------|----------|
| tcf-miR-n501 | 0.111554 | 0.136144               | 0.206347               | 0.157172               | 0.262815               | 0.125967 |
| tcf-miR-n502 | 0.861694 | 0.037547               | 0.044632               | 0.017245               | 0.021867               | 0.017015 |
| tcf-miR-n503 | 0.831527 | 0.007357               | 0.007329               | 0.003515               | 0.004771               | 0.145500 |
| tcf-miR-n504 | 0.950499 | 0.020240               | 0.015818               | 0.006514               | 0.005600               | 0.001329 |
| tcf-miR-n505 | 0.010353 | 0.100467               | 0.159503               | 0.158920               | 0.315935               | 0.254822 |
| tcf-miR-n506 | 0.039977 | 0.102603               | 0.142380               | 0.098340               | 0.194715               | 0.421986 |
| tcf-miR-n507 | 0.019855 | 0.113685               | 0.224360               | 0.084021               | 0.284276               | 0.273803 |
| tcf-miR-n508 | 0.001611 | 0.000000               | 0.000000               | 0.000000               | 0.000000               | 0.998389 |
| tcf-miR-n509 | 0.083571 | 0.157717               | 0.244056               | 0.172861               | 0.197485               | 0.144309 |
| tcf-miR-n510 | 0.216958 | 0.105602               | 0.183009               | 0.054018               | 0.105253               | 0.335160 |
| tcf-miR-n511 | 0.070025 | 0.353763               | 0.303084               | 0.113113               | 0.130264               | 0.029752 |
| tcf-miR-n512 | 0.986627 | 0.001093               | 0.004148               | 0.001075               | 0.004534               | 0.002523 |
| tcf-miR-n513 | 0.000000 | 0.051609               | 0.116976               | 0.158739               | 0.351604               | 0.321072 |
| tcf-miR-n514 | 0.026304 | 0.190920               | 0.243543               | 0.112619               | 0.338416               | 0.088198 |
| tcf-miR-n515 | 0.135898 | 0.104023               | 0.165779               | 0.168924               | 0.272361               | 0.153015 |
| tcf-miR-n516 | 0.045952 | 0.095454               | 0.209158               | 0.181062               | 0.340954               | 0.127420 |
| tcf-miR-n517 | 0.189692 | 0.292519               | 0.238864               | 0.113306               | 0.147729               | 0.017890 |
| tcf-miR-n518 | 0.552611 | 0.140489               | 0.133174               | 0.088725               | 0.068898               | 0.016103 |
| tcf-miR-n519 | 0.074760 | 0.380048               | 0.323066               | 0.066683               | 0.134738               | 0.020705 |
| tcf-miR-n520 | 0.887713 | 0.018282               | 0.037337               | 0.023177               | 0.033490               | 0.000000 |
| tcf-miR-n521 | 0.886102 | 0.011715               | 0.012122               | 0.005759               | 0.018218               | 0.066086 |
| tcf-miR-n522 | 1.000000 | 0.000000               | 0.000000               | 0.000000               | 0.000000               | 0.000000 |
| tcf-miR-n523 | 0.154581 | 0.422768               | 0.180714               | 0.078153               | 0.107032               | 0.056751 |
| tcf-miR-n524 | 0.212232 | 0.282018               | 0.212991               | 0.124289               | 0.131066               | 0.037404 |
| tcf-miR-n525 | 0.125759 | 0.282384               | 0.293221               | 0.113394               | 0.173769               | 0.011473 |
| tcf-miR-n526 | 0.000000 | 0.000000               | 0.011325               | 0.021951               | 0.038904               | 0.927820 |
| tcf-miR-n527 | 0.561788 | 0.147336               | 0.158806               | 0.047981               | 0.072283               | 0.011806 |
| tcf-miR-n528 | 0.077472 | 0.285611               | 0.348251               | 0.069101               | 0.143755               | 0.075811 |
| tcf-miR-n529 | 0.068163 | 0.075911               | 0.185085               | 0.119666               | 0.230672               | 0.320503 |
| tcf-miR-n530 | 0.178315 | 0.244915               | 0.288684               | 0.119287               | 0.141432               | 0.027367 |
| tcf-miR-n531 | 0.124330 | 0.188000               | 0.216145               | 0.157104               | 0.262196               | 0.052224 |
| tcf-miR-n532 | 0.344516 | 0.185225               | 0.187167               | 0.140843               | 0.092157               | 0.050093 |
| tcf-miR-n533 | 0.063240 | 0.157638               | 0.275854               | 0.139024               | 0.233469               | 0.130775 |
| tcf-miR-n534 | 0.146270 | 0.230023               | 0.228858               | 0.110171               | 0.205278               | 0.079399 |
| tcf-miR-n535 | 0.878151 | 0.020952               | 0.032520               | 0.014419               | 0.021722               | 0.032236 |
| tcf-miR-n536 | 0.200920 | 0.300919               | 0.179638               | 0.113785               | 0.115704               | 0.089033 |
| tcf-miR-n537 | 1.000000 | 0.000000               | 0.000000               | 0.000000               | 0.000000               | 0.000000 |
| tcf-miR-n538 | 0.167565 | 0.263155               | 0.220781               | 0.097892               | 0.168539               | 0.082068 |
| tcf-miR-n539 | 0.097598 | 0.314835               | 0.244328               | 0.143154               | 0.174857               | 0.025228 |
| tcf-miR-n540 | 0.060188 | 0.291234               | 0.272052               | 0.067603               | 0.137786               | 0.171137 |
| tcf-miR-n541 | 0.000000 | 0.000000               | 0.087086               | 0.034752               | 0.127142               | 0.751019 |
| tcf-miR-n542 | 0.064705 | 0.135674               | 0.242976               | 0.159035               | 0.270495               | 0.127115 |
| tcf-miR-n543 | 0.188865 | 0.282863               | 0.215764               | 0.123002               | 0.112790               | 0.076716 |
| tcf-miR-n544 | 0.213825 | 0.290993               | 0.130105               | 0.042383               | 0.087791               | 0.234903 |
| tcf-miR-n545 | 0.000000 | 0.227278               | 0.207505               | 0.236587               | 0.277208               | 0.051422 |
| tcf-miR-n546 | 0.378108 | 0.325256               | 0.166524               | 0.064953               | 0.000000               | 0.065158 |
| tcf-miR-n547 | 0.000000 | 0.112914               | 0.121704               | 0.180389               | 0.313557               | 0.271437 |
| tcf-miR-n548 | 0.095930 | 0.167621               | 0.244600               | 0.177469               | 0.248255               | 0.066125 |
| tcf-miR-n549 | 0.093445 | 0.313999               | 0.335736               | 0.117306               | 0.139514               | 0.000000 |
| tcf-miR-n550 | 0.193449 | 0.156008               | 0.280255               | 0.134204               | 0.144410               | 0.091675 |
| tcf-miR-n551 | 0.079663 | 0.282675               | 0.454252               | 0.126321               | 0.057089               | 0.000000 |
| tcf-miR-n552 | 0.214509 | 0.133071               | 0.321283               | 0.143908               | 0.187230               | 0.000000 |
| tcf-miR-n553 | 0.450813 | 0.075220               | 0.183771               | 0.160226               | 0.129971               | 0.000000 |
| tcf-miR-n554 | 0.142406 | 0.331773               | 0.286081               | 0.037635               | 0.103944               | 0.098161 |
| tcf-miR-n555 | 0.169565 | 0.341867               | 0.259411               | 0.087386               | 0.141770               | 0.000000 |
| tcf-miR-n556 | 0.000000 | 0.000000               | 0.085603               | 0.078080               | 0.161734               | 0.674584 |
| tcf-miR-n557 | 0.000000 | 0.170162               | 0.097818               | 0.000000               | 0.126009               | 0.606011 |
| tcf-miR-n558 | 0.200669 | 0.388394               | 0.209315               | 0.087505               | 0.000000               | 0.114116 |
| tcf-miR-n559 | 0.000000 | 0.114087               | 0.295126               | 0.140203               | 0.450584               | 0.000000 |
| tcf-miR-n560 | 0.206400 | 0.221937               | 0.175424               | 0.218192               | 0.178046               | 0.000000 |
| tcf-miR-n561 | 0.000000 | 0.378937               | 0.326750               | 0.106441               | 0.106900               | 0.080972 |
| tcf-miR-n562 | 0.324074 | 0.121964               | 0.270430               | 0.059953               | 0.167732               | 0.055846 |
| tcf-miR-n563 | 0.252747 | 0.240889               | 0.351516               | 0.154847               | 0.000000               | 0.000000 |
| tcf-miR-n564 | 0.000000 | 0.216648               | 0.242855               | 0.117146               | 0.256693               | 0.166658 |
| tcf-miR-n565 | 0.285409 | 0.326074               | 0.000000               | 0.132000               | 0.170446               | 0.086071 |
| tcf-miR-n566 | 0.000000 | 0.000000               | 0.000000               | 0.085263               | 0.660583               | 0.254154 |
| tcf-miR-n567 | 0.241138 | 0.291701               | 0.217991               | 0.086034               | 0.100805               | 0.062331 |
| tcf-miR-n568 | 0.135128 | 0.196154               | 0.319487               | 0.107136               | 0.242095               | 0.000000 |
| tcf-miR-n569 | 0.000000 | 0.298121               | 0.395482               | 0.067636               | 0.135856               | 0.102905 |
| tcf-miR-n570 | 0.191130 | 0.330296               | 0.151897               | 0.097417               | 0.130449               | 0.098810 |
| tcf-miR-n571 | 0.000000 | 0.000000               | 0.228575               | 0.000000               | 0.176669               | 0.594756 |
| tcf-miR-n572 | 0.000000 | 0.303588               | 0.327223               | 0.087053               | 0.168611               | 0.113525 |
| tcf-miR-n573 | 0.147796 | 0.452926               | 0.205552               | 0.105462               | 0.088264               | 0.000000 |
| tcf-miR-n574 | 0.000000 | 0.404680               | 0.162842               | 0.066309               | 0.279697               | 0.086473 |
| tcf-miR-n575 | 0.000000 | 0.189622               | 0.000000               | 0.000000               | 0.000000               | 0.810378 |
| tcf-miR-n576 | 0.229938 | 0.000000               | 0.133247               | 0.136729               | 0.183092               | 0.316994 |
| tcf-miR-n577 | 0.474740 | 0.000000               | 0.235807               | 0.188198               | 0.101255               | 0.000000 |
| tcf-miR-n578 | 0.204954 | 0.303025               | 0.261292               | 0.108331               | 0.122398               | 0.000000 |
| tcf-miR-n579 | 0.000000 | 0.000000               | 0.445456               | 0.217665               | 0.218604               | 0.118274 |
| tcf-miR-n580 | 0.000000 | 0.000000               | 0.166432               | 0.227709               | 0.457381               | 0.148478 |
| tcf-miR-n581 | 1.000000 | 0.000000               | 0.000000               | 0.000000               | 0.000000               | 0.000000 |
| tcf-miR-n582 | 0.000000 | 0.000000               | 0.000000               | 0.000000               | 0.000000               | 1.000000 |
| tcf-miR-n583 | 0.000000 | 0.000000               | 0.000000               | 0.175288               | 0.396099               | 0.428613 |
| tcf-miR-n584 | 0.534466 | 0.000000               | 0.171537               | 0.146683               | 0.147315               | 0.000000 |
| tcf-miR-n585 | 0.000000 | 0.292583               | 0.409969               | 0.107867               | 0.189582               | 0.000000 |
| tcf-miR-n586 | 0.000000 | 0.000000               | 0.198128               | 0.225895               | 0.340304               | 0.235672 |
| tcf-miR-n587 | 0.000000 | 0.309338               | 0.433447               | 0.114045               | 0.143170               | 0.000000 |
| tcf-miR-n588 | 0.000000 | 0.000000               | 0.203119               | 0.115793               | 0.348876               | 0.332212 |
| tcf-miR-n589 | 0.000000 | 0.380640               | 0.393862               | 0.000000               | 0.225498               | 0.000000 |
| tcf-miR-n590 | 0.000000 | 0.464603               | 0.327778               | 0.207620               | 0.000000               | 0.000000 |
| tcf-miR-n591 | 0.000000 | 0.000000               | 0.000000               | 0.000000               | 0.000000               | 1.000000 |
| tcf-miR-n592 | 0.000000 | 0.352914               | 0.342350               | 0.000000               | 0.163339               | 0.141397 |
| tcf-miR-n593 | 0.289768 | 0.311580               | 0.167919               | 0.000000               | 0.230733               | 0.000000 |



**Table S9. miRNA clusters in *T. cancriformis***

| Cluster                                  | Strand | Contig#           | Start position | End position | Length (nt) | Expression correlation |
|------------------------------------------|--------|-------------------|----------------|--------------|-------------|------------------------|
| miR-96/263b/263a                         | minus  | contig_68-70816   | 44256          | 45925        | 1670        | r > 0.93 **            |
| miR-277/34                               | plus   | contig_643-10482  | 320            | 1625         | 1306        | r = 0.66               |
| miR-2a-2/2a/13/2b/71                     | minus  | contig_751-13972  | 11521          | 12303        | 783         | r > 0.96 **            |
| miR-12/3477/283                          | minus  | contig_869-45389  | 28247          | 29019        | 773         | r > 0.60               |
| miR-n504/n512/n537/n503                  | plus   | contig_1320-28899 | 25634          | 26273        | 640         | r > 0.98 ***           |
| miR-2788/193                             | minus  | contig_1401-52320 | 26513          | 26775        | 263         | r = 0.87 *             |
| miR-305/275                              | minus  | contig_1756-59422 | 31314          | 31547        | 234         | r = 0.81 *             |
| miR-61/279b                              | plus   | contig_1838-20014 | 11507          | 11737        | 231         | r = 0.53               |
| miR-252a/252b                            | minus  | contig_2308-38970 | 25406          | 27071        | 1666        | r > 0.83 *             |
| miR-87/n505                              | plus   | contig_2981-25385 | 3101           | 3296         | 196         | r = 0.90 *             |
| miR-n509/995                             | plus   | contig_3153-8869  | 5995           | 6309         | 315         | r = 0.92 **            |
| miR-92a/92b                              | plus   | contig_4248-31752 | 30650          | 30887        | 238         | r = 0.99 ***           |
| let-7/miR-100                            | minus  | contig_5716-15662 | 2819           | 3063         | 245         | r > 0.81 *             |
| miR-n527/n518/n502/n520/n535             | minus  | contig_8886-8311  | 1674           | 2310         | 637         | r > 0.95 **            |
| miR-3791/279c/n521/n511/998/2944/9b/279e | minus  | contig_9912-3069  | 1103           | 3031         | 1929        | r > -0.19              |
| miR-1175/750                             | minus  | contig_10104-5963 | 445            | 745          | 301         | r > -0.02              |

Statistically significant differences: \*  $p \leq 0.05$ , \*\* $p \leq 0.01$  and \*\*\* $p \leq 0.001$ .

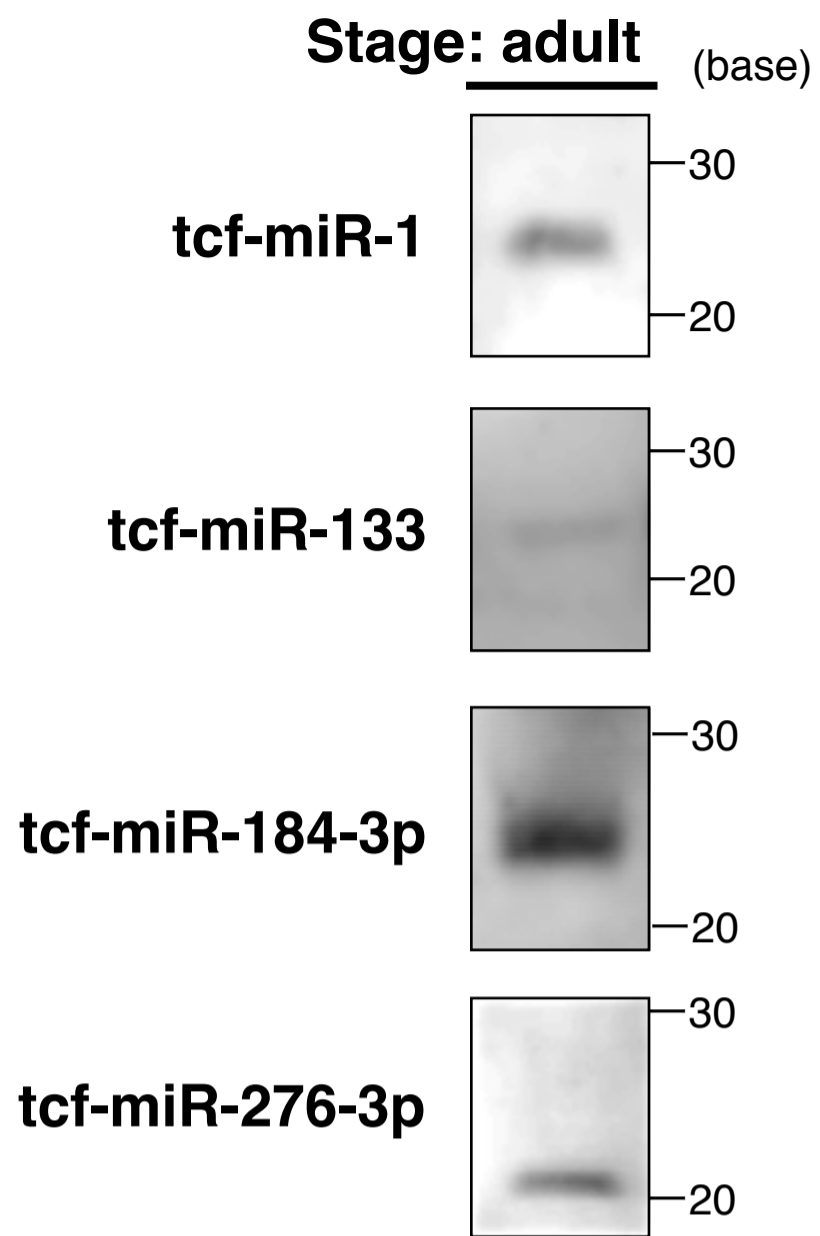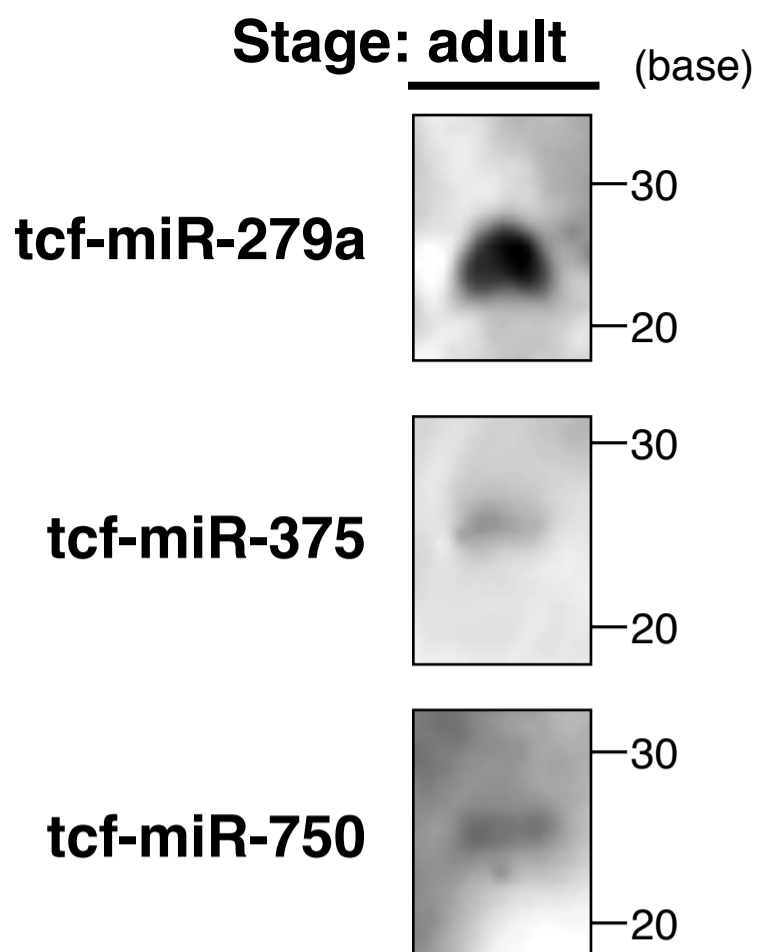

**A****dme tcf dpu cel**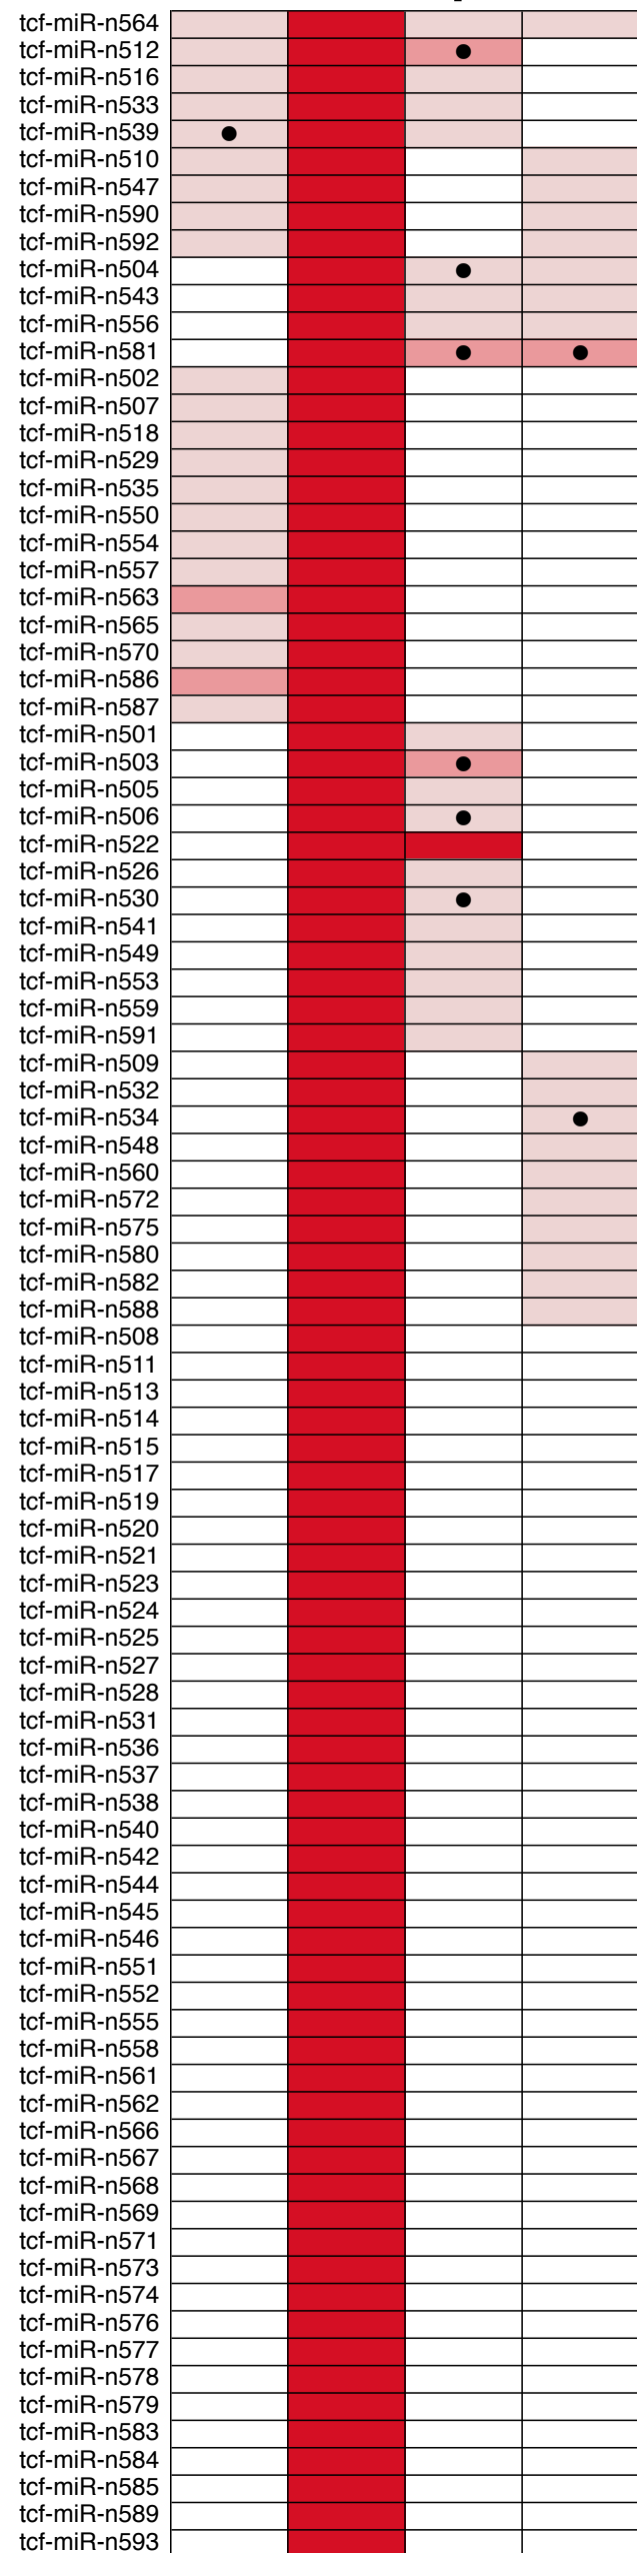**B****tcf-miR-n539**

```

U---          C          CCUUAACCAUA  AC-  G
CUGAGAACGGUUCGA UCGACUCG          GUG  UCG \
GACUCUUGCCAAGCU AGCUGAGU          CAC  AGC C
UCCC          C          AUUCCAUG--  CUC  U

```

**dme-miR-n539**

```

UCU-  ACG  -----  C          C  GA          C  CUA
GAGA  GUUC  GAUCU GAUAUGAG AU  UUUGAUC  UUG  G
UUCU  CAAG  CUAGA CUAUACUC UA  AAACUAG  AAU  A
UCUU  GA-  AGUUG  A          -  A-          -  UUU

```

**C****tcf-miR-n534**

```

--          C          A
CAUUCUUGUAG AGUAUCACCUU \
GUAAGAACAUC UCAUAGUGGAA G
AC          A          C

```

**cel-miR-n534**

```

C-  UUGU  C--  G-  -  A
AUUC  AGCAGU  UC  GCA  GAC  C
UGAG  UCGUCA  AG  CGU  CUG  U
CA  UU--  CUU  GA  C  U

```

**tcf-miR-n581**

```

A-          G  U  A--  UGC
GCUUGAAC  AG  GGAU  GCGUACC  \
UGAGCUUG  UC  CCUG  UGCGUGG  C
CC          G  -  GAG          UGU

```

**cel-miR-n581**

```

UU--  CU  U  CA  -  -  AGA
UCGA  GCCGGG  GGCU  GU  UG  GGUAG  G
AGCU  UGGUCC  CUGG  CA  GC  CUAUC  A
CCUU  --  -  A-  C  A  GGU

```

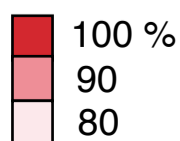

**A*****Triops cancriformis***

miR-n503

```

--      -      U      CU AC
GCUUCGAAUC UAUGG UGCAAUG G \
CGGAGCUUGG AUGUC ACGUAC C U
AG      U      -      UU GU

```

miR-n504

```

C--      U      CU      UA
CCUAUUACU GUUGG CAACAU C
GGGUGAUGG CAAUC GUUGUA G
UUC      C      AC      CU

```

miR-n506

```

UUG      UAAAUG
GUUUGAGAUGAGUGGACCCG \
CAAACUCUAUUCACCUGGGC U
UAA      CUAUAA

```

miR-n512

```

--      U -      U      U CGAAU
CCUUGG CA GCCA GUGC AUG U
GGGGCC GU CGGU CACG UAC U
UG      C C      -      U AAUAU

```

miR-n530

```

AAGAAA AU - - - AG
CGA CG GCG CU GAGACU U
GCU GC CGU GA CUUUGA C
GAUCA- CG A A C CA

```

miR-n581

```

A-      G U      A--      UGC
GCUUGAAC AG GGAU GCGUACC \
UGAGCUUG UC CCUG UGCGUGG C
CC      G -      GAG      UGU

```

***Daphnia pulex***

```

A--      AC      U UU U CAU
CUUCGAGCCG CAGU GC UG GG C
GGAGCUUGGC GUCA CG AC UC A
AGC      AU      -      UU U AGA

```

```

A--- U      G UG CG UA
CU CUGCUGGUUAGU G ACU UAU \
GG GAUGGCCAAUCA C UGA AUG C
GCAG U      -      GU CA UA

```

```

--      G      GAG      G      UU
UUGGUUU AGUU UGGA UUG \
GAUCAGA UCGA AUCU AGC A
AA      G      AG-      G      CA

```

```

--      A -      AU      -      GAUG
CCUUG GCA GCCA UGCAGAG UC \
GGGAC CGU CGGU ACGUUUC AG A
CG      C C      C-      U GAAU

```

```

--      GAAAC      UGC      U UC
GG      GAAUG      GCUGAGAC G \
CC      CUUAC      UGGCUUUG C G
CG AA---      U--      C GU

```

```

C--- - UU A G G - U
UC AG GGG GA C UUAGA C G
AG UU UCC CU G AAUCU G A
CCUU C GG - G A A A

```

**B**

|              |    |                          |    |
|--------------|----|--------------------------|----|
| tcf-miR-n503 | 5' | UUGCACUGUAUGGUUCGAGGCCGA | 3' |
| dpu-miR-n503 |    | UUGCACUGUACGGUUCGAGGCCGA |    |
| tcf-miR-n504 |    | UUGCACUAACCGGUAGUGGGCUU  |    |
| dpu-miR-n504 |    | UUGCACUAACCGGUAGUGGGACG  |    |
| tcf-miR-n512 |    | UUGCACUGGCCUGCCCGGGGU-   |    |
| dpu-miR-n512 |    | UUGCACUGGCCUGCCAGGGGC-   |    |
|              |    | *****                    | ** |

**C**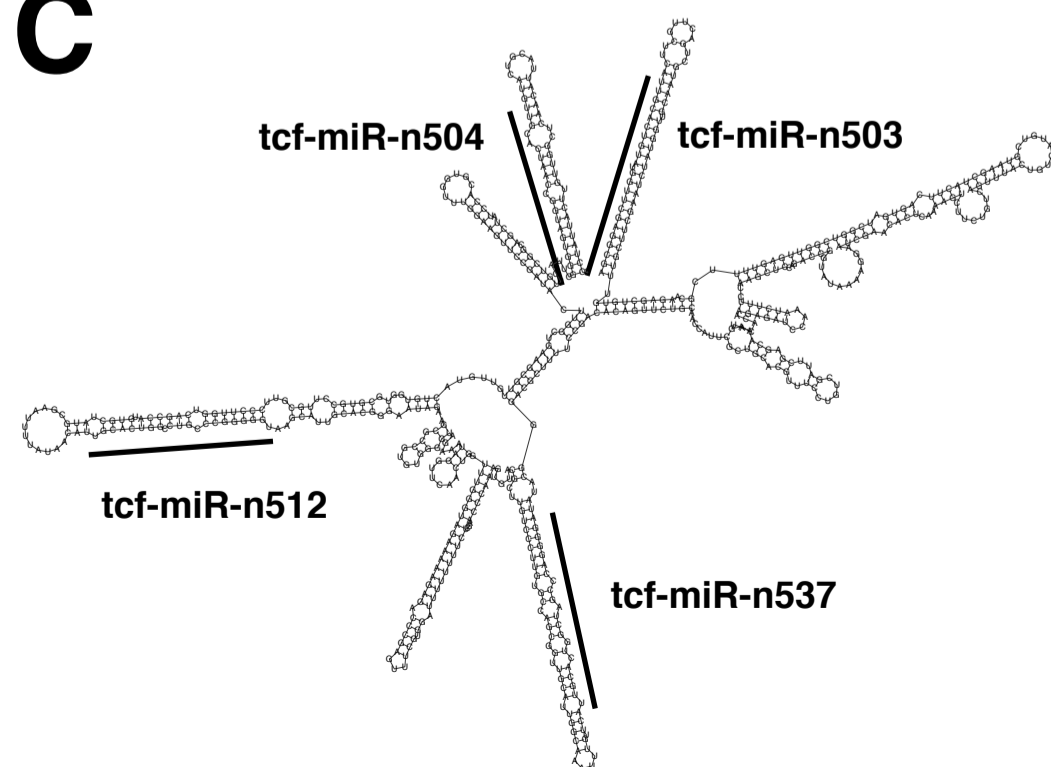**D**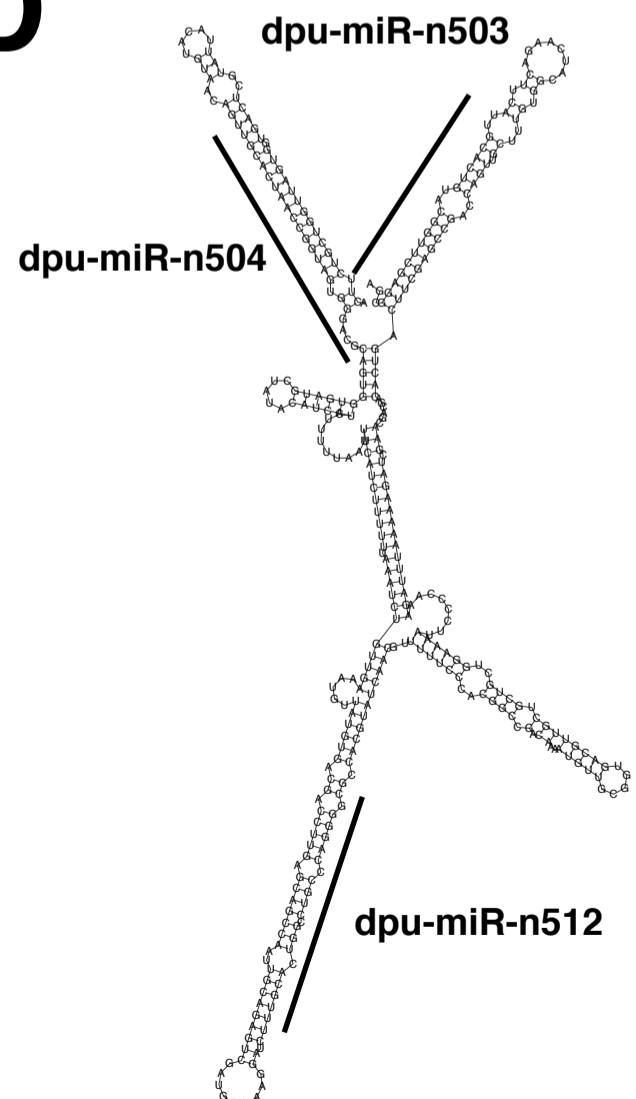









**C****tcf AGO3 (744 a.a.)**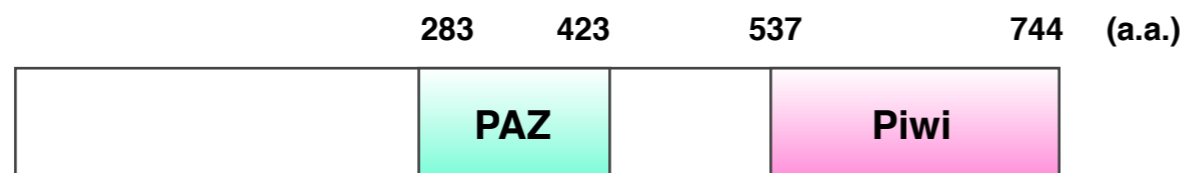**PAZ**

283

423

tcf AGO3 KLAHAI PAHKKNES-ORRQLNFKELVOKELIGLVVVTKYNNRNRYRIDDEVDOTPKSTFTFYSGEEISYKDYKKOYNLQIRDENOPLLLNRLTKKROGEEDKTHLVCLVPELCHITGLSDELRADRKIMKDLSFHTRVSPM  
 dpu AGO3 ----TIVRDELVEM-SKGGYFHQTAQDVLIGLSVLTRYNNKMYRIDEILFDKNPLSIFDCQ-GEPMSYVDYKKOYNIDIQDKGQPMLLNRLKMKMOGKEDETIVLVCLVPELCLTGLDDRLRSNFTIMRSLATHTKVAPM  
 dme AGO3 ILCQKTVLEMLVDLYQONVEHYQESARKMLVGNIVLTRYNNRKYKINDICFDQNPCTCQFEIKTG-CTSYVEYYKQYHNINIKDVNOPLIYSIKKSRGIPAERENLQFCLIPCLCYLTG-----

**Piwi**

537

744

tcf AGO3 PQLVFLNDRDITYIA-----ALRKISREVINRINRDPKVRSIMOKIALQINCKLGGELWAVKIP-----LVNGQYPGTIIIIYRDGV  
 dpu AGO3 LVVAIFPTSRDDRYAAVKTLCTAQYAIPSQMMNSKTIISNP SKLRSVVOKIALQINCKMGGELWAVSIPTKTLMVCGVDVYHDPKRGQSVVGFVASVNPGLTRWFSRAKYOGPGVELVDTLKI CFLESLKKYELNODYPKQIVLFRDGV  
 dme AGO3 MVVCICHNRDRRYAAIKKICSEIPIPSQVINAKTLQNDLKIRSVVOKIVLQMNCKLGGSLWTVKIPFKNVMICGIDSYHDPNRRGNSVAAFVASINSSYSQWYSKAVVQTKREEIVNGLSASF EIALKMYRKRNGKLPNTNIIYRDGI

tcf AGO3 GDGQLTLVREHEVQQLMTAFESVGPDYHPKFTTEVVVOKRINTRIFAQLHSGKLDNPAPGTVVDHTVVRNWFDFFLVSOHVGGTVSPTHYVVVKDGG-MKVDHLQRLTYKMTMYYNWPPTVRVPAPCL-----  
 dpu AGO3 GDGQLQFAAAHEAAQFLSAFOALSPPFEPKFTMVVVOKRINTRLRFHNSR-GAINNPPPGTVVDHTVTRRDWDFFLVSQFVTQGTVSPTHFIVVHDGG-MKPDNLQKLAYKMTMYYNWPPTIRVPAPCQYAHKLAYLVGESIR  
 dme AGO3 GDGQLYTCLNVEIPIPOFEMVCGNR-----IKISYIVVOKRINTRIFSGSG-IHLENPLPGTVVDQHIKSNMYDFFLVSQVLRQGTVPPTHYVVLRDDCNYPDI IQKLSYKLCFLYYNWAGTVRI PACCMYAHKLAYLIGOSIQ

**D****tcf PIWI (782 a.a.)**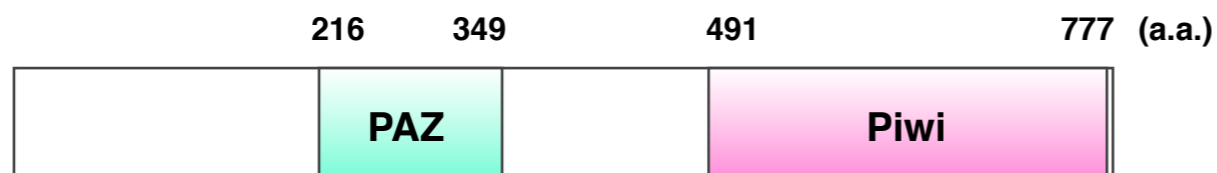**PAZ**

216

349

tcf PIWI ERASDVLAR---NLRSGEAAALASLLGEIVMTRYNNKTYRVDDIDWGKTPADTFELRKEKRMVSYAEYYQERYNLVTRDMRQPM LISKPKESRNRGDDQPVYLIPEHAYMTGLSEEMRKDFNTMKTVGAVTRLDPP  
 dme PIWI ETIYDIMRRC SHNPARHQDEVRVNVLDLIVLTDYNNRKYRINDVDFGQTPKSTFSCK--GRDISFVEYYLTKYNIRIRDHNOPLLISKNRDKALKTNASELVVLIPELCRVTG-----

**Piwi**

491

777

tcf PIWI FILVLLRSQRADMYAAIKKLLTCENAI PNQVITGRILKKG--LSVATKVIYIQMACMGC EAWRVQIPMQNAMAIGFDTYHD-KGQKRSVGFVAVSIN-QAMTRYCSTAVLHNSNEELCGKIGICMRKSLVEYQKANGGAVPDKIFYYRDG  
 dme PIWI LILCLVPNDNAERYSSIKKRGYVDRAPTQVVT LKTKNRS LMSIATKIAIQLNCKLGYTPWMIELPLSGLMTIGFDIAKSTRDRKRAYGALIASMDLQONSTYFSTVTECSAFDVLANTLWPMIAKALROYOHEHR-KLPSRIVFYRDG

tcf PIWI VGTGDIQY LKMOEIAQLREAFRATHPDYN---PKLVVVLVSKRINTRIMRESAREGNPEPGTVVDVITL PDRYDFFLVSQYVTOGTVSPTAYNVIEDTLGLPPDRVOOLT YKLT HLYYNWQFT--LSAVFWIFRERSDRIRSFGR  
 dme PIWI VSSGSLKQLFEFEVKDIEK LKTEYARVQLSPPQLAYIVVTRSMNTRFFLNGQ---NPPPPTIVDDVITLPERYDFYLVSOQVROGTVSPTS YNVLYSSMGLSPEKMKLTYKMC HLYYNWSGTTTRVPAVCOYAKKLATLVGTLNH
